# Supplementary material for: Automated Sound Recognition Provides Insights into the Behavioral Ecology of a Tropical Bird
Source: PLOS journal article supplement (doi:10.1371/journal.pone.0169041), 2017-01-13
Supplement: S15 (10.1371/journal.pone.0169041.s015) [file journal.pone.0169041.s015]

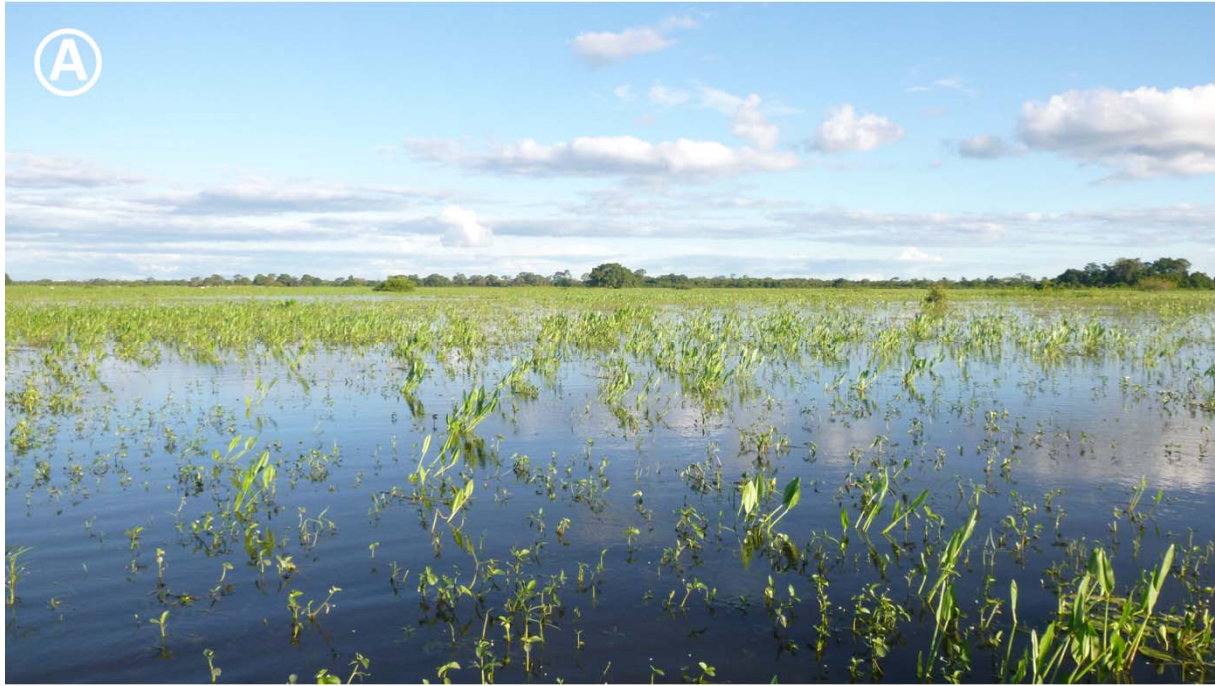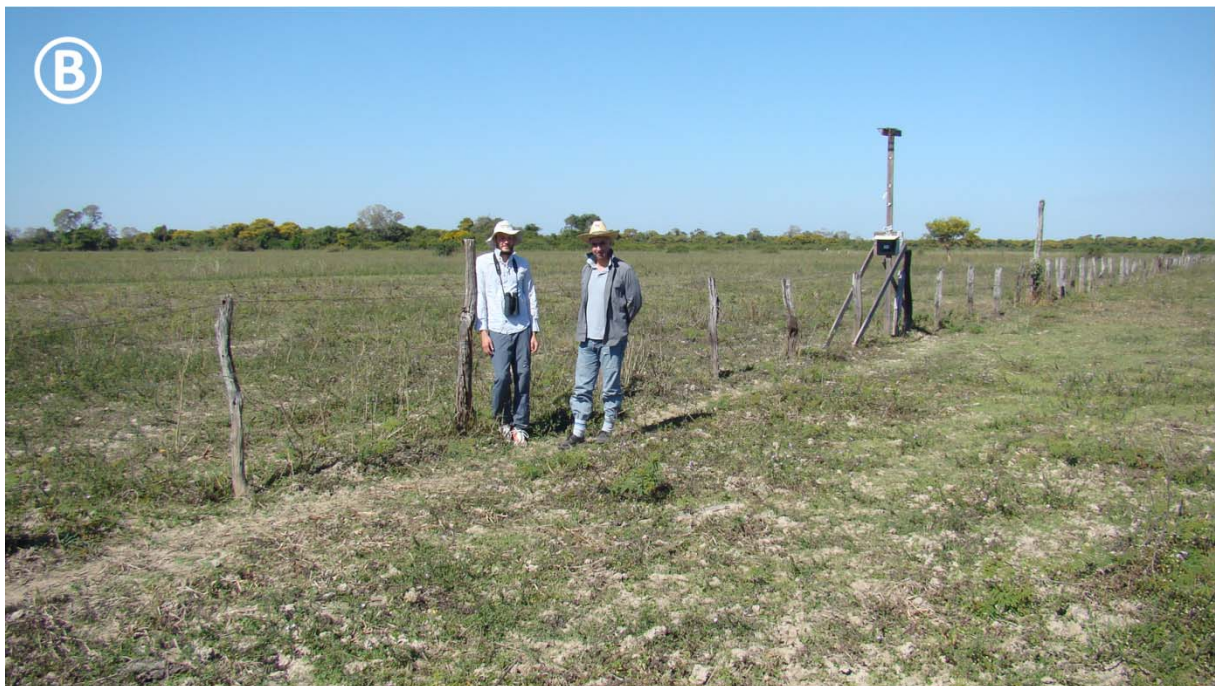

**S2 Fig. *Vanellus chilensis* habitat near recording station PPA001 in the Fazenda Pouso Alegre area.** A: flooded cattle pasture with macrophytes at the height of the flood season. The water level at PPA001 was about 65 cm on that date (24 Feb. 2013). B: dry savannah-like cattle pasture at PPA001 at the end of the *V. chilensis* breeding season (2 Aug. 2013). The SM2+ recorder with the omnidirectional SMX-II microphone to the left is mounted in the middle and the acrylic glass pane of the night flight call (NFC) microphone on the top of the 3.5-m high wooden construction (upper right quarter of the image). In the present study we processed only channel A, corresponding to the left microphone (i.e. SMX-II). Images by courtesy of CO.BRA/INAU (<http://cobra.ic.ufmt.br>). Cf. S1 Fig, yellow star marks recording site PPA001.
