# Supplementary material for: Automated Sound Recognition Provides Insights into the Behavioral Ecology of a Tropical Bird
Source: PLOS journal article supplement (doi:10.1371/journal.pone.0169041), 2017-01-13
Supplement: S17 (10.1371/journal.pone.0169041.s017) [file journal.pone.0169041.s017]

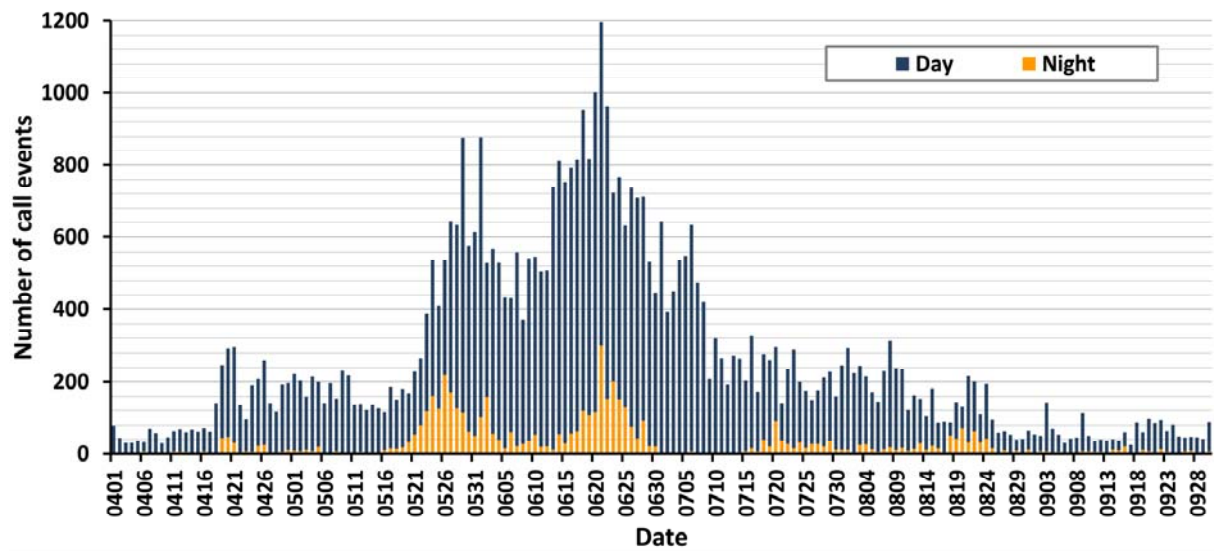

**S4 Fig. Uncorrected *Vanellus chilensis* cumulative daily acoustic activity for the period April to September 2013** (*cf.* Fig 3, Table 3, and S1 Table).
